# Supplementary material
Source: publisher figshare collection journal article supplement (https://frontiersin.figshare.com/ndownloader/files/21529290)
Supplement: Supplementary file [file 21529290]

A

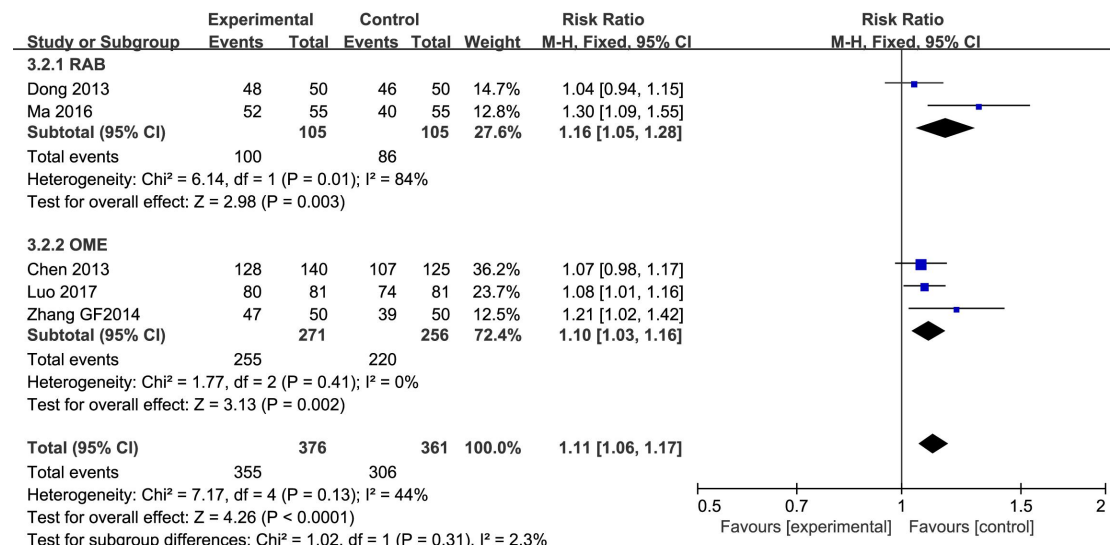

B

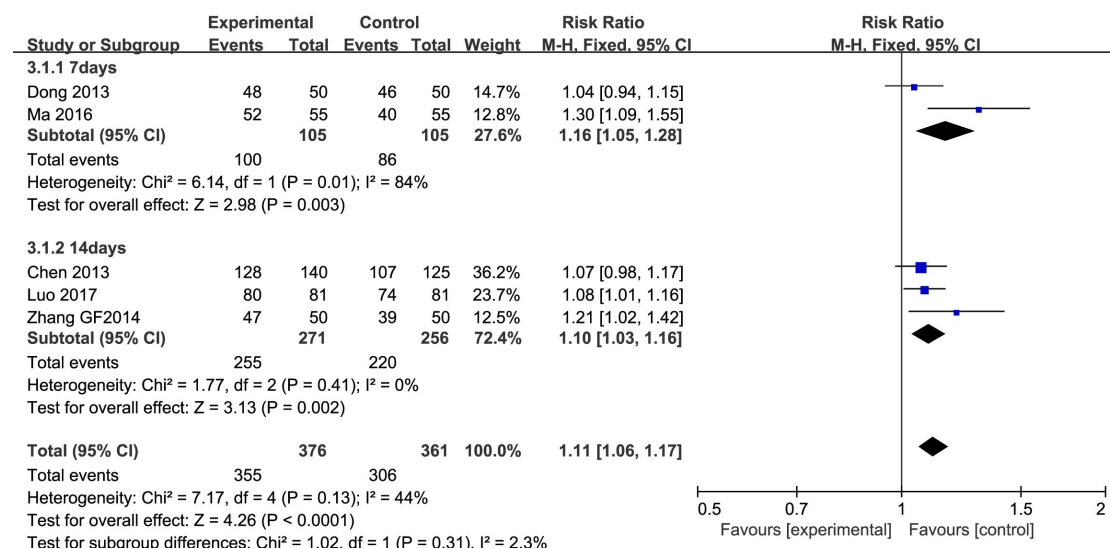

C

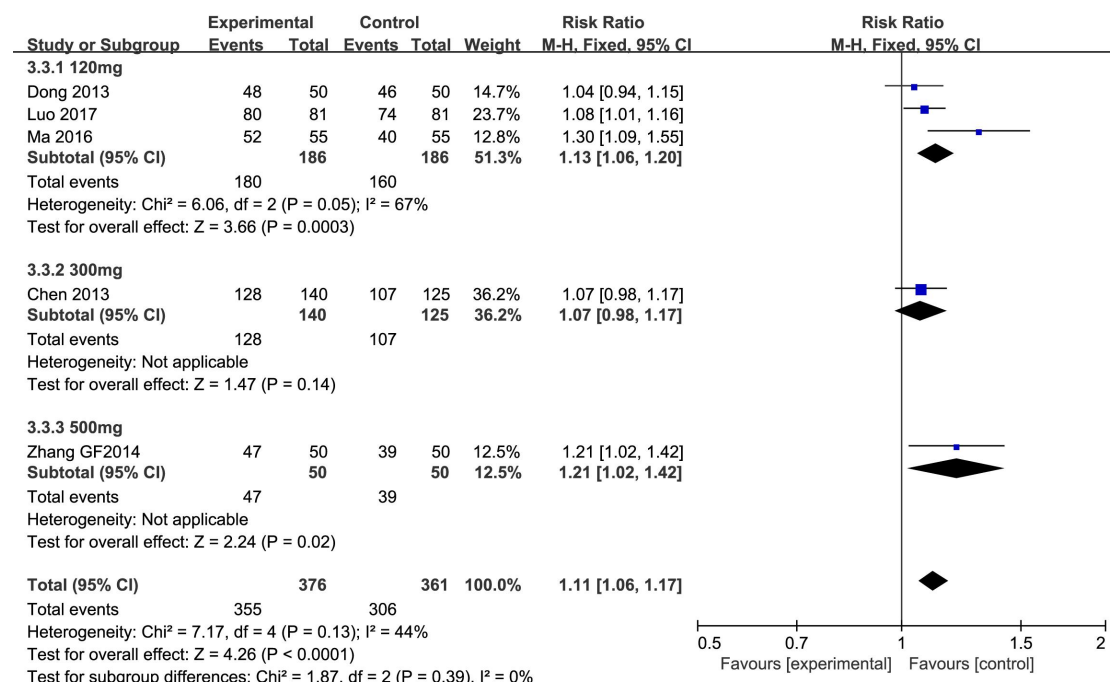

Supplementary figure 3-2. (A) Subgroup analysis of the relieving rate of clinical symptoms about the PPI type. (B) Subgroup analysis of the relieving rate of clinical symptoms about the time of treatment duration. (C) Subgroup analysis of the relieving rate of clinical symptoms about the dose of berberine.
